# Supplementary material
Source: MDPI journal article supplement (https://www.mdpi.com/1999-4907/7/12/316)
Supplement: s1 [file s1]

Supplementary Material: Effects of Different Ectomycorrhizal Fungal Inoculates on the Growth of *Pinus tabulaeformis* Seedlings under Greenhouse Conditions

Nan Lu, Meng Yu, Ming Cui, Zijing Luo, Yue Feng, Sen Cao, Yuhan Sun and Yun Li


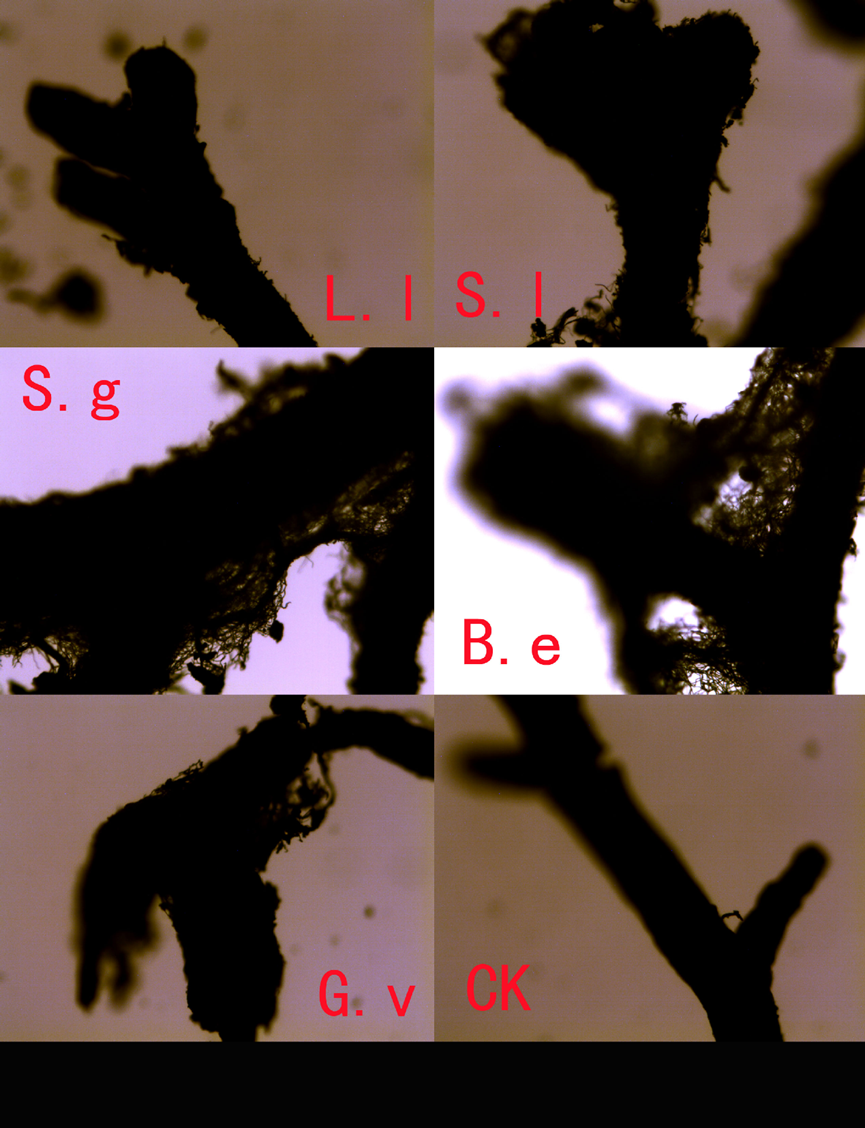


**Figure S1.** Colonisation of P. tabulaeformis roots under microscopic examination: *Laccaria laccata* (L.l), *Suillus luteus* (S.l), *Suillus grevillei* (S.g), *Boletus edulis* (B.e), *Gomphidius viscidus* (G.v), and non-mycorrhizal (CK).


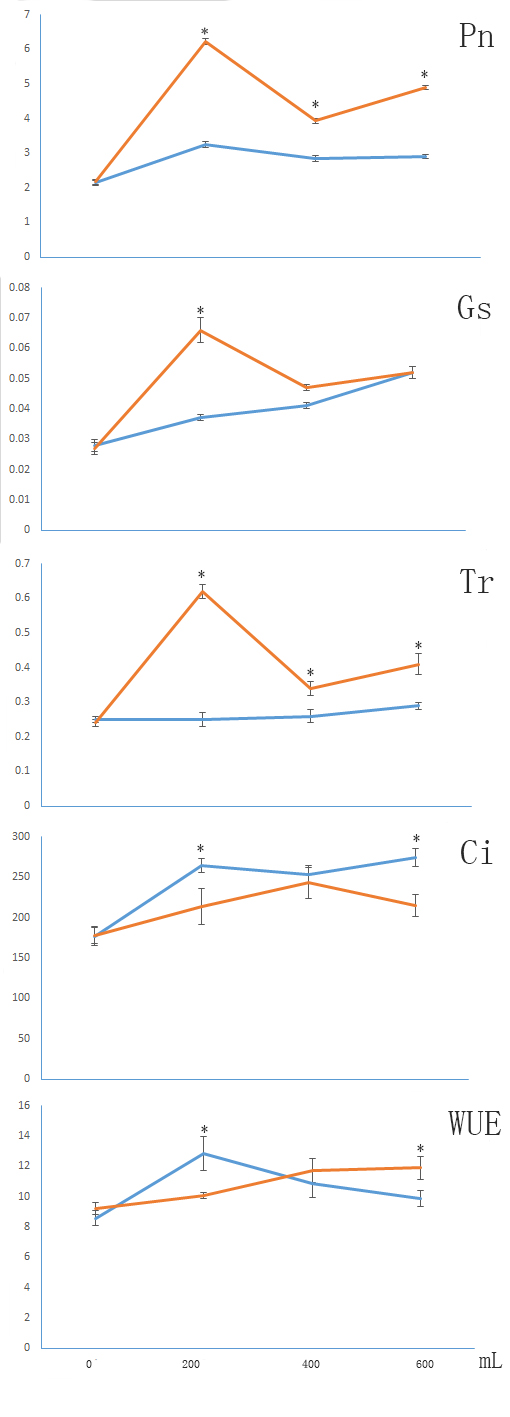


**Figure S2.** Effects of different dosages (0, 200, 400, and 600 mL) moist (orange) or dry (blue) inoculum on gas exchange parameters of *P. tabuliformis* under field conditions: *Pn*: net photosynthetic rate (μmol·m-2·s-1); *Gs*: stomatal conductance (mol·m-2·s-1); *Tr*: transpiration rate (mmol·m-2·s-1); *Ci*: intercellular CO2 concentration (μmol·mol-1); WUE: water-use efficiency (mol·m-2·s-1). * significant difference (*p* < 0.05, *α* = 0.05, ANOVA).

© 2016 by the authors. Submitted for possible open access publication under the
terms and conditions of the Creative Commons Attribution (CC-BY) license (http://creativecommons.org/licenses/by/4.0/).
